# Supplementary material for: Improving the thermoelectric properties of half-Heusler TiNiSn through inclusion of a second full-Heusler phase: microwave preparation and spark plasma sintering of TiNi1+xSn
Source: Royal Society of Chemistry journal article supplement (doi:10.1039/c3cp50918d), 2013-01-01
Supplement: c3cp50918d.pdf [file c3cp50918d.pdf]

## ELECTRONIC SUPPLEMENTARY INFORMATION

### Improving the thermoelectric properties of half-Heusler TiNiSn through inclusion of a secondary full-Heusler phase: Microwave preparation and Spark Plasma Sintering of TiNi<sub>1+x</sub>Sn

Christina S. Birkel,<sup>ab</sup> Jason E. Douglas,<sup>bc</sup> Bethany R. Lettiere,<sup>b</sup> Gareth Seward,<sup>d</sup> Nisha Verma,<sup>c</sup> Yichi Zhang,<sup>a</sup> Tresa M. Pollock,<sup>bc</sup> Ram Seshadri,<sup>abc</sup> and Galen D. Stucky<sup>\*ac</sup>

#### Analytical conditions of microprobe analysis

Ti K $\alpha$ , Ni K $\alpha$ , and Sn L $\alpha$  X-ray intensities were measured using LPET, LLIF, and LPET analyzing crystals. X-ray intensity maps were collected using 15 keV accelerating voltage with 100 nA of beam current. An area of 125 $\times$ 125  $\mu$ m was traversed using continuous stage translation to create a 256 $\times$ 256 pixel map with a dwell time of 125 ms per pixel. Quantitative analysis was conducted at 15 keV accelerating voltage and 10 nA beam current. Ti K $\alpha$ , Ni K $\alpha$ , and Sn L $\alpha$  intensities were measured on-peak for 20 seconds and 10 seconds off-peak either side of the peak to create a linear background interpolation.

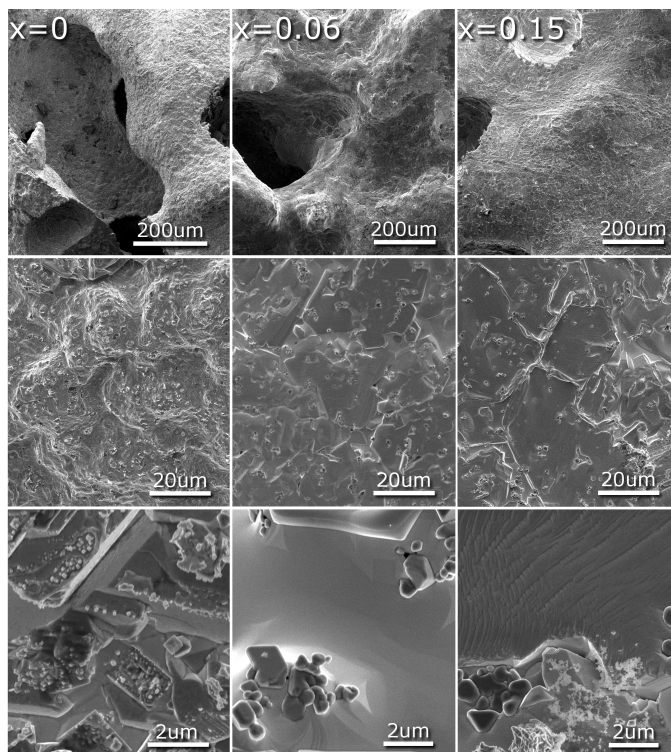

**Figure S1.** SEM images of as-prepared TiNiSn, TiNi<sub>1.06</sub>Sn, and TiNi<sub>1.15</sub>Sn

\*Fax: 805-893-4120; Tel: 805-893-4872; E-mail: stucky@chem.ucsb.edu

<sup>a</sup> Department of Chemistry and Biochemistry, University of California, Santa Barbara, California 93106-9510 USA

<sup>b</sup> Materials Research Laboratory, University of California, Santa Barbara, California 93106-5121 USA

<sup>c</sup> Materials Department, University of California, Santa Barbara, California 93106-5050 USA

<sup>d</sup> Department of Earth Sciences, University of California, Santa Barbara, California 93106-9630 USA

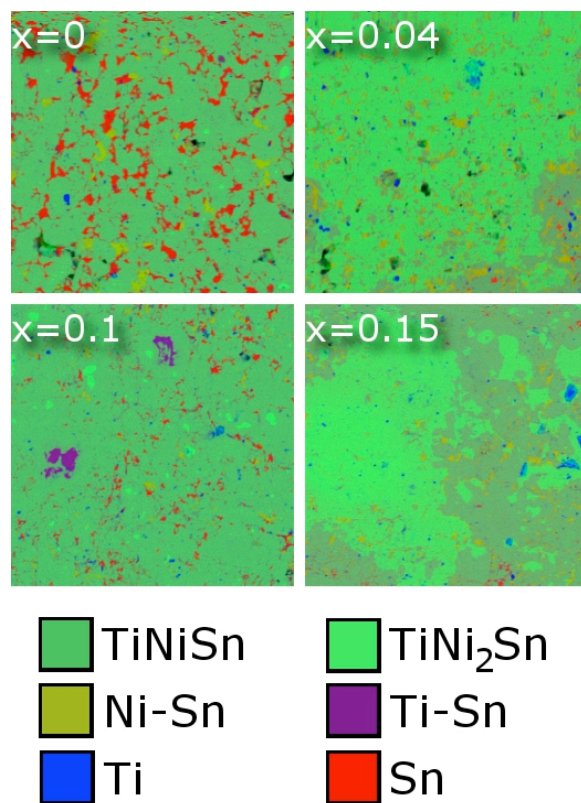

**Figure S2.** Microprobe images of  $\text{TiNi}_{1+x}\text{Sn}$  with  $x = 0, 0.04, 0.1,$  and  $0.15$ .
